# Supplementary material
Source: PubMed Central journal article supplement (PMC1895937)
Supplement: pnas_0702650104_2.pdf [file pnas_0702650104_2.pdf]

|            | FR1                     | CDR L1             | FR2             | CDR L2         | FR3                         |
|------------|-------------------------|--------------------|-----------------|----------------|-----------------------------|
| 14B7       | DIVLIQSTSSLSASLGDRVTISC | <b>RASQDIRNYLN</b> | WYQQKPDGTVKLLIY | <b>YTSRLQS</b> | GVPSRFSGSGSGTDYSLTISNLEQEDI |
| 1H         | .....                   | .....              | .....           | .....LP        | .....                       |
| M18        | .....V                  | .....              | .....F          | .....P         | .....N.L                    |
| Clone 2-4  | .....                   | .....              | .....           | .....          | .....L.I                    |
| Clone 2-16 | .....R                  | .....V             | .....           | .....P         | .....G                      |
| Clone 2-30 | .....                   | .....              | .....           | .....          | .....V                      |
| Clone 2-38 | .....                   | .....              | .....           | .....P         | .....                       |

|            | CDR L3                 | FR4         | Linker                     | FR1                        | CDR H1           |
|------------|------------------------|-------------|----------------------------|----------------------------|------------------|
| 14B7       | GTYFC <b>QQGNTLPWT</b> | FGGGTKLEIKR | <b>GGGGSGGGSGGGGSGGGGS</b> | EVQLQQSGPELVKPGASVKISCKDSG | <b>YAFSSSWMN</b> |
| 1H         | .....                  | .....R      | .....                      | .....                      | .....            |
| M18        | .....P                 | .....       | .....                      | .....                      | .....N           |
| Clone 2-4  | .....A                 | L.....S     | .....                      | .....                      | .....S           |
| Clone 2-16 | .....                  | .....       | .....                      | .....                      | .....            |
| Clone 2-30 | .....                  | .....       | .....                      | .....                      | .....            |
| Clone 2-38 | .....                  | .....       | .....                      | .....                      | .....            |

|            | FR2         | CDR H2                  | FR3                             | CDR H3             | FR4          |
|------------|-------------|-------------------------|---------------------------------|--------------------|--------------|
| 14B7       | QRPGQGPEWIG | <b>RIYPGDGDNYNGKFKG</b> | KATLTADKSSSTAYMQLSSLTSDSAVYFCAR | <b>SGLLRVYAMDY</b> | WGQGTSTVTVSS |
| 1H         | .....       | .....                   | .....                           | .....              | .....        |
| M18        | .....       | .....S.....E            | .....I                          | .....              | .....        |
| Clone 2-4  | .....       | .....                   | .....                           | .....              | .....        |
| Clone 2-16 | .....       | .....                   | .....L                          | .....              | .....        |
| Clone 2-30 | .....       | .....                   | .....N                          | .....              | .....P.F     |
| Clone 2-38 | .....       | .....                   | .....L                          | .....F             | .....        |
