# Supplementary material
Source: PubMed Central journal article supplement (PMC1895937)
Supplement: pnas_0702650104_5.pdf [file pnas_0702650104_5.pdf]

**(A)**

1 MKALLPTAAAGLLLLAAQPAMAEVQLVESGGGLVQPGGSLRLSCADSGYAFNSSWMNWVR 60  
**PeIB leader** **VH1**

61 QAPGKGLEWVGRIPYDGDSDSNYNGKFEGRRAISADKSSSTAYLQMNSLRAEDTAVYYCAR 120

121 SGLLRYAMDYWGQGLTVTVSSASFKGPSVFPLAPSSKSTSGGTAALGCLVKDYFPEPTV 180  
**CH1**

181 SWNSGALTSGVHTFPAVLQSSGLYSLSSVTVPSSSLGTQTYICNVNHKPSNTKVDKKVE 240

241 PKSCSAADYKDDDDKAG<sup>\*</sup> 257  
**FLAG tag**

1 MKLTHHLRRTGAALLLAGILLAGCDQSSSEAQPADIQMTQTPSSLSASVGDRVTVTCRAS 60  
**NlpA leader** **6 aa** **VL**

61 QGIRNYLNWYQQKPGKAPKFLIYYTSRLLPGVPSRFSGSGSGTDYTLTINSLEQEDIATY 120

121 YCQQGNTPPWTFGGGTKVEIKRTTAAAPSVFIPPSDEQLKSGTASVWCLLNNFYPREAK 180  
**Ck**

181 VQWKVDNALQSGNSQESVTEQDSKDSTYSLSSTLTLSKADYEKHKVYACEVTHQGLSSPV 240

241 TKSFNRGECVDHHHHHHHGAAEQKLISEEDLNGRAA<sup>\*</sup> 275  
**His tag**

**(B)**

|           | PeIB                   | FR1                          | CDR H1      | FR2              | CDR H2        |
|-----------|------------------------|------------------------------|-------------|------------------|---------------|
| ML8.1 hum | MKALLPTAAAGLLLLAAQPAMA | [EVQLVESGGGLVQPGGSLRLSCADSG] | YAFNSSWMN   | [WVRQAPGKGLEWVG] | RIYPGDGDSNYNG |
| Clone #3  | .....V.....            | [.....]                      | .....D..... | [.....]          | .....         |
| Clone #28 | .....                  | [.....R.....]                | .....       | [.....]          | .....         |

  

|           | FR3                                   | CDR H3      | FR4           | CH1            |
|-----------|---------------------------------------|-------------|---------------|----------------|
| ML8.1 hum | KFEG[RAISADKSSSTAYLQMNSLRAEDTAVYYCAR] | SGLLRYAMDY  | [WGQGLTVTVSS] | ASFKGPSVF..... |
| Clone #3  | .....[.....]                          | .....       | [.....]       | .....          |
| Clone #28 | .....[.....]                          | .....F..... | [.....]       | .....          |
